# Supplementary material
Source: PubMed Central journal article supplement (PMC4404759)
Supplement: NIHMS651615-supplement-01.pdf [file NIHMS651615-supplement-01.pdf]

Table S1. Multiple Regression of Demographic and Group Variables on Social Communication Questionnaire (SCQ) Score

|                           | B     | Std. Error | Beta    |
|---------------------------|-------|------------|---------|
| Male gender               | 0.23  | 1.13       | 0.02    |
| Romanian Ethnicity        | 0.49  | 1.27       | 0.04    |
| Birth Weight (grams)      | 0.00  | 0.00       | 0.03    |
| Gestational Age (weeks)   | -0.26 | 0.34       | -0.08   |
| Group (NIG, FCG, or CAUG) | -2.46 | 0.77       | -0.30** |

Note:  $R^2 = .099$ . CAUG = care-as-usual group; FCG: foster care group; NIG = never-institutionalized group.

\*\*  $p \leq .01$

Table S2. Pearson Correlations Between Social Communication (SCQ) Score and Social Skills Rating System (SSRS) Score

| SSRS scale                           | Pearson correlation<br>with SCQ score |
|--------------------------------------|---------------------------------------|
| Social Skills (Parent Report)        | -0.618***                             |
| Social Skills (Teacher Report)       | -0.286**                              |
| Problem Behaviors (Parent Report)    | 0.369***                              |
| Problem Behaviors (Teacher Report)   | 0.391***                              |
| Academic Competence (Teacher Report) | -0.148                                |

Note: All scores expressed are Pearson correlations between SCQ score and SSRS standard score.

\*\*  $p < .01$ ; \*\*\*  $p < .001$

Table S3. Pearson Correlations Between Social Communication (SCQ) Score and Wechsler Intelligence Scale for Children (WISC-IV) Score by Group

|                      | Never-<br>Institutionalized | Ever Institutionalized |             |
|----------------------|-----------------------------|------------------------|-------------|
|                      |                             | Care-As-Usual          | Foster Care |
| Full Scale IQ        | 0.129                       | -0.089                 | -0.551***   |
| WISC-IV Subtest      |                             |                        |             |
| Verbal Comprehension | -0.008                      | -0.19                  | -0.543***   |
| Perceptual Reasoning | 0.149                       | 0.007                  | -0.509***   |
| Working Memory       | 0.137                       | 0.002                  | -0.433**    |
| Processing Speed     | 0.168                       | -0.061                 | -0.368**    |

Note: All scores expressed are Pearson correlations between SCQ score and WISC-IV score.

\*\*  $p < .01$ ; \*\*\*  $p < .001$
